# Supplementary material for: In situ construction of hetero-structured perovskite composites with exsolved Fe and Cu metallic nanoparticles as efficient CO2 reduction electrocatalysts for high performance solid oxide electrolysis cells
Source: Royal Society of Chemistry journal article supplement (doi:10.1039/d1ta07678g), 2021-12-02
Supplement: d1ta07678g1.pdf [file d1ta07678g1.pdf]

# **In-situ Construction of Hetero-structured Perovskite Composites with Exsolved Fe and Cu Metallic Nanoparticles as Efficient CO<sub>2</sub> Reduction Electrocatalyst for High Performance Solid Oxide Electrolysis Cells**

Xiuan Xi<sup>a</sup>, Yun Fan<sup>a</sup>, Jiujuan Zhang<sup>b</sup>, Jing-Li Luo<sup>a</sup>, Xian-Zhu Fu<sup>a\*</sup>

<sup>a</sup> College of Materials Science and Engineering, Shenzhen University, Shenzhen 518060, China

<sup>b</sup> Institute for Sustainable Energy, College of Sciences, Shanghai University, Shanghai, 200444, China

---

\* Corresponding author: E-mail: [xz.fu@szu.edu.cn](mailto:xz.fu@szu.edu.cn)

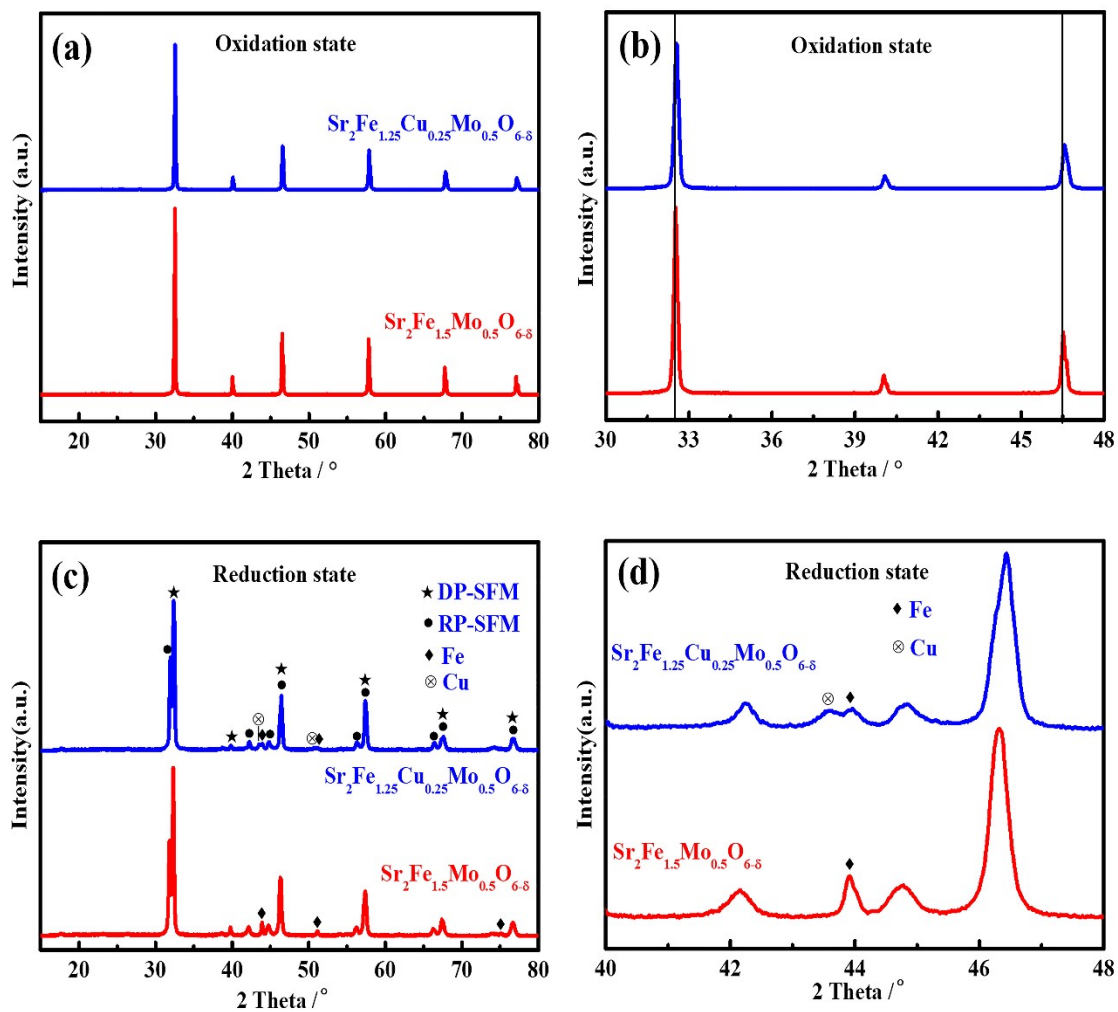

**Fig. S1.** (a) As-synthesized  $\text{Sr}_2\text{Fe}_{1.5}\text{Mo}_{0.5}\text{O}_{6-\sigma}$  (SFM) and  $\text{Sr}_2\text{Fe}_{1.25}\text{Cu}_{0.25}\text{Mo}_{0.5}\text{O}_{6-\sigma}$  (SFCuM) powders; (b) magnification of (a); (c) reduced  $\text{Sr}_2\text{Fe}_{1.5}\text{Mo}_{0.5}\text{O}_{6-\sigma}$  (SFM) and  $\text{Sr}_2\text{Fe}_{1.25}\text{Cu}_{0.25}\text{Mo}_{0.5}\text{O}_{6-\sigma}$  (SFCuM) powders; (d) magnification of (c).

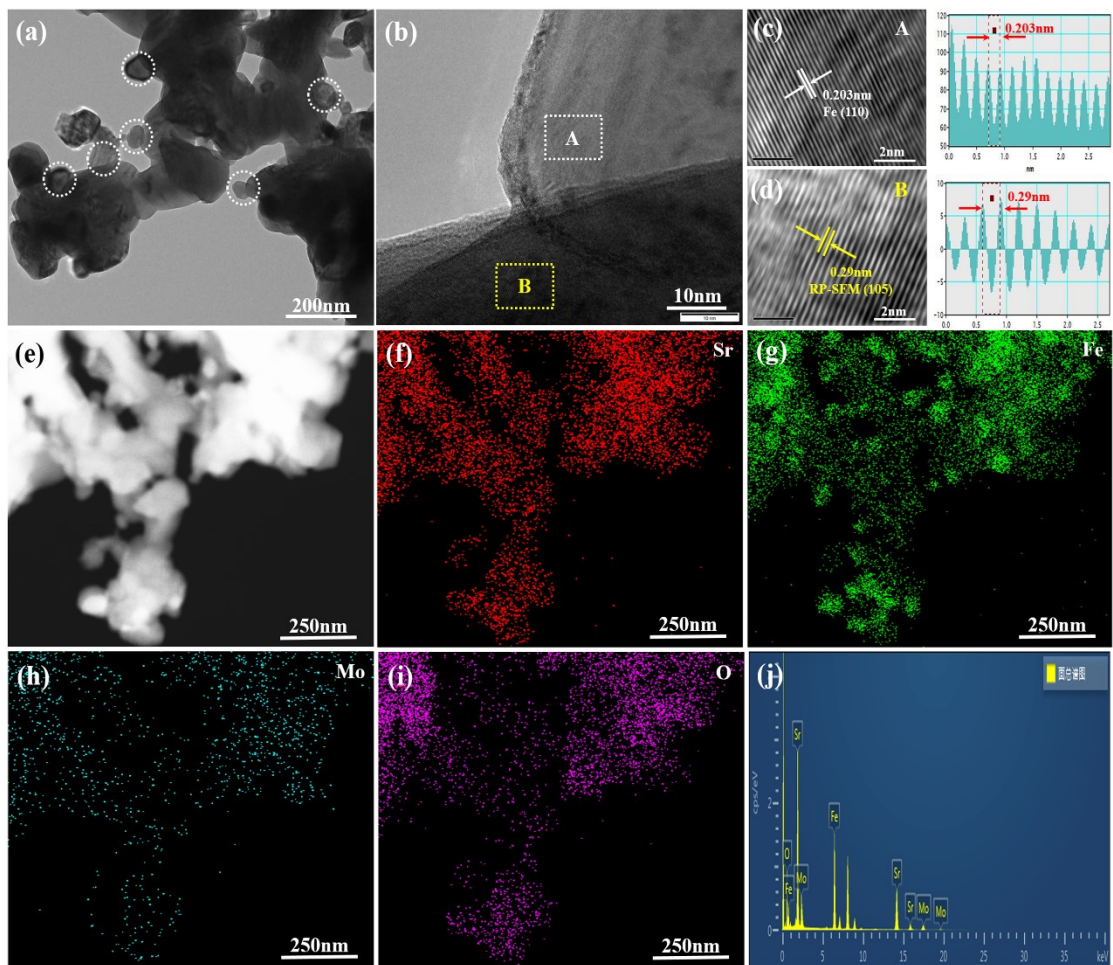

**Fig. S2.** (a-d) HR-TEM micrographs of the reduced  $\text{Sr}_2\text{Fe}_{1.5}\text{Mo}_{0.5}\text{O}_{6-\sigma}$  (SFM) particles; (e-i) TEM-EDS elemental mappings of the reduced SFM particles, (j) amount of each element in SFM.

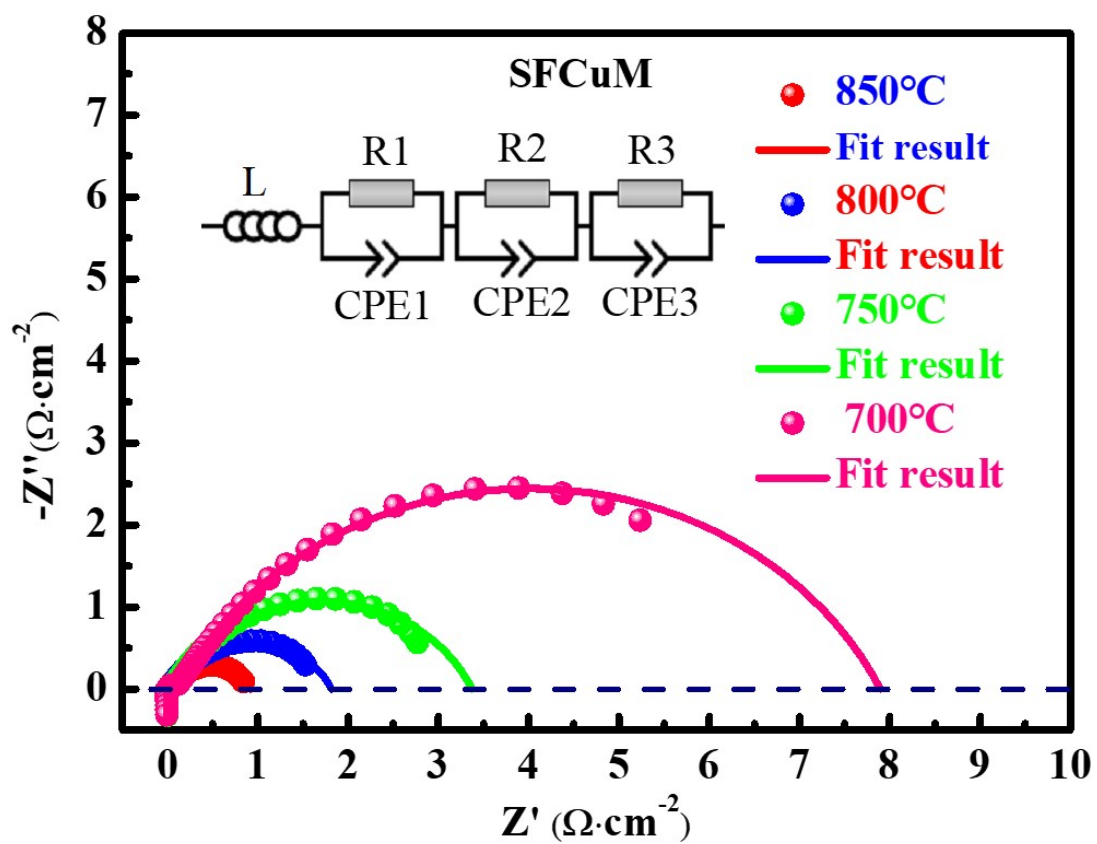

**Fig. S3.** EIS of LSGM electrolyte-supported symmetrical cells with the configuration SFCuM/LDC/LSGM/LDC/SFCuM under a 1:1 CO–CO<sub>2</sub> atmosphere at different operating temperatures.

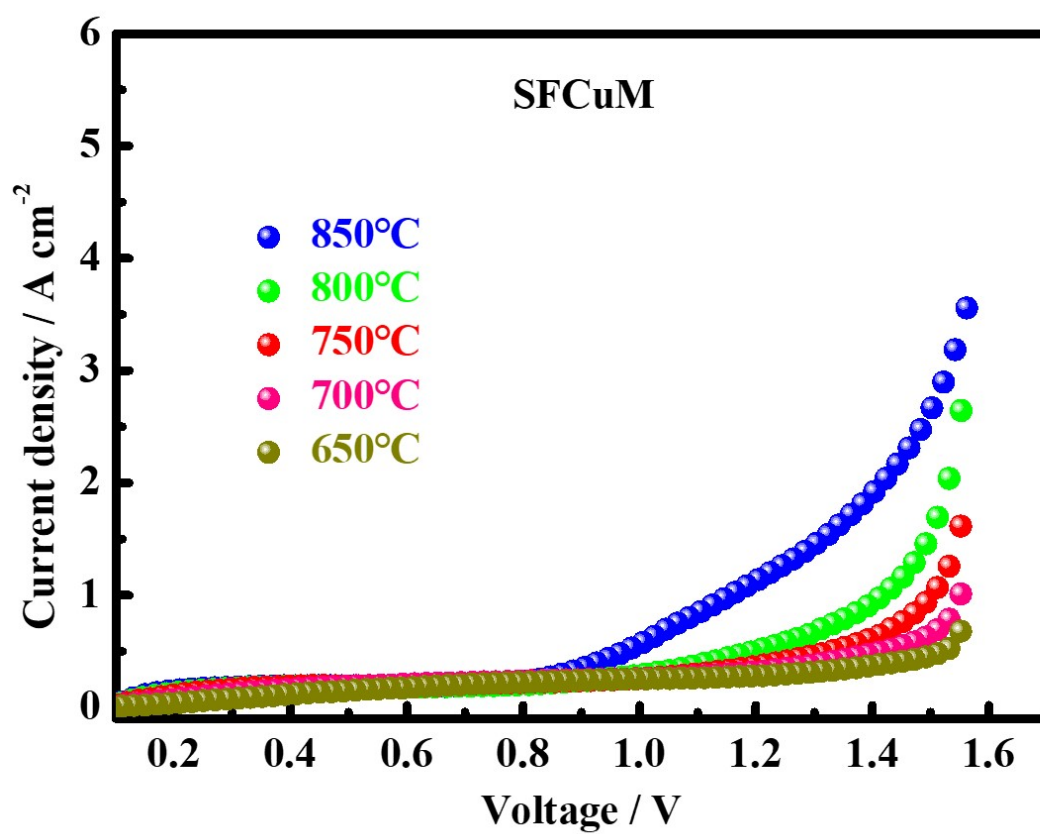

**Figure S4.** Current density of LSGM electrolyte-supported single cells with the configuration SFCuM/LDC/LSGM/LSCF-SDC under pure CO<sub>2</sub> atmosphere at different operating temperatures.

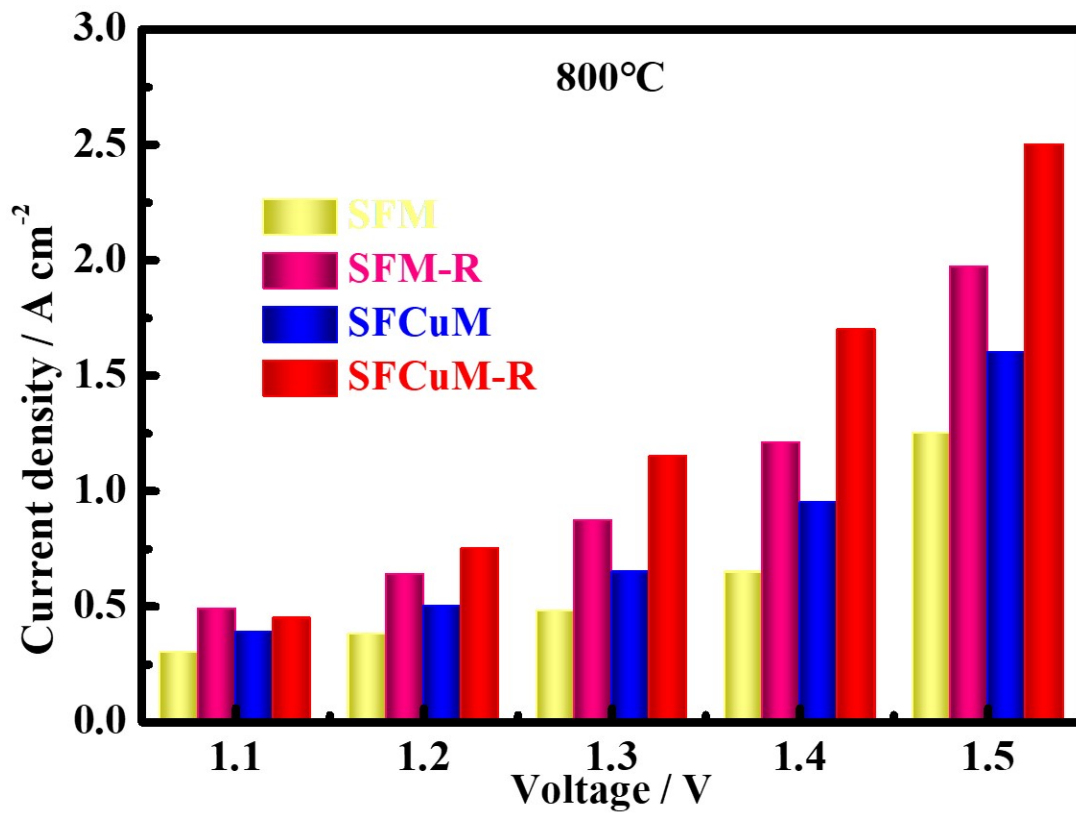

Figure S5. Current density comparison of the LSGM-electrolyte supported single cell with various cathodes at the operating temperature of 800°C.

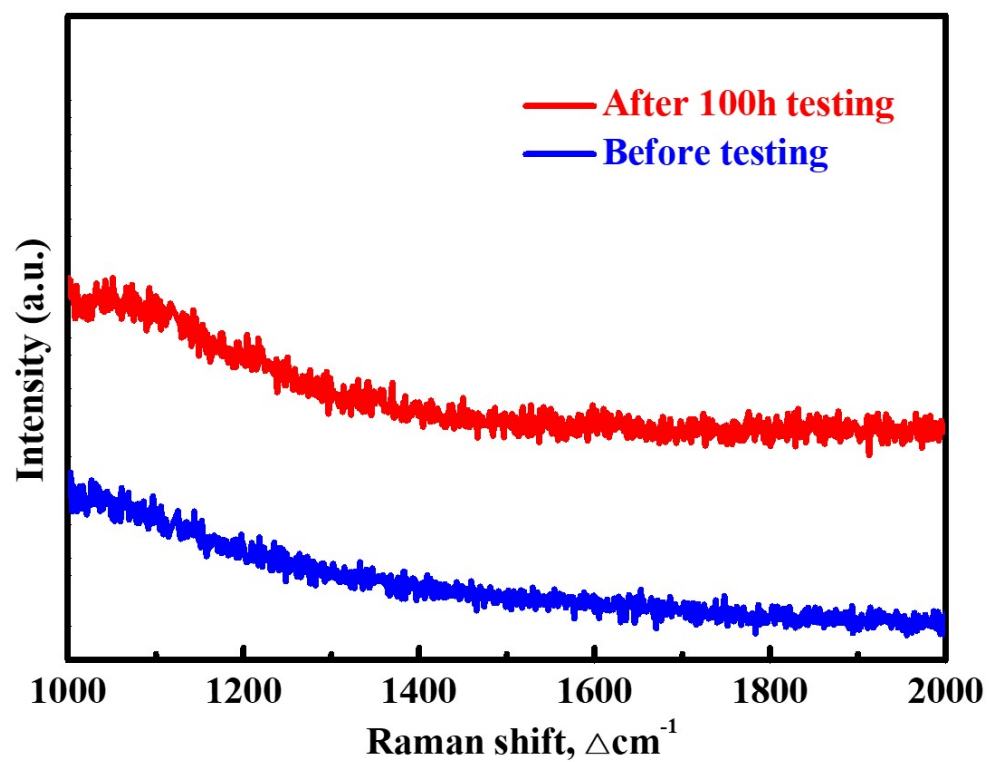

**Figure S6.** Raman spectroscopy of the SFCuM-R cathode before and after long-term stability testing.

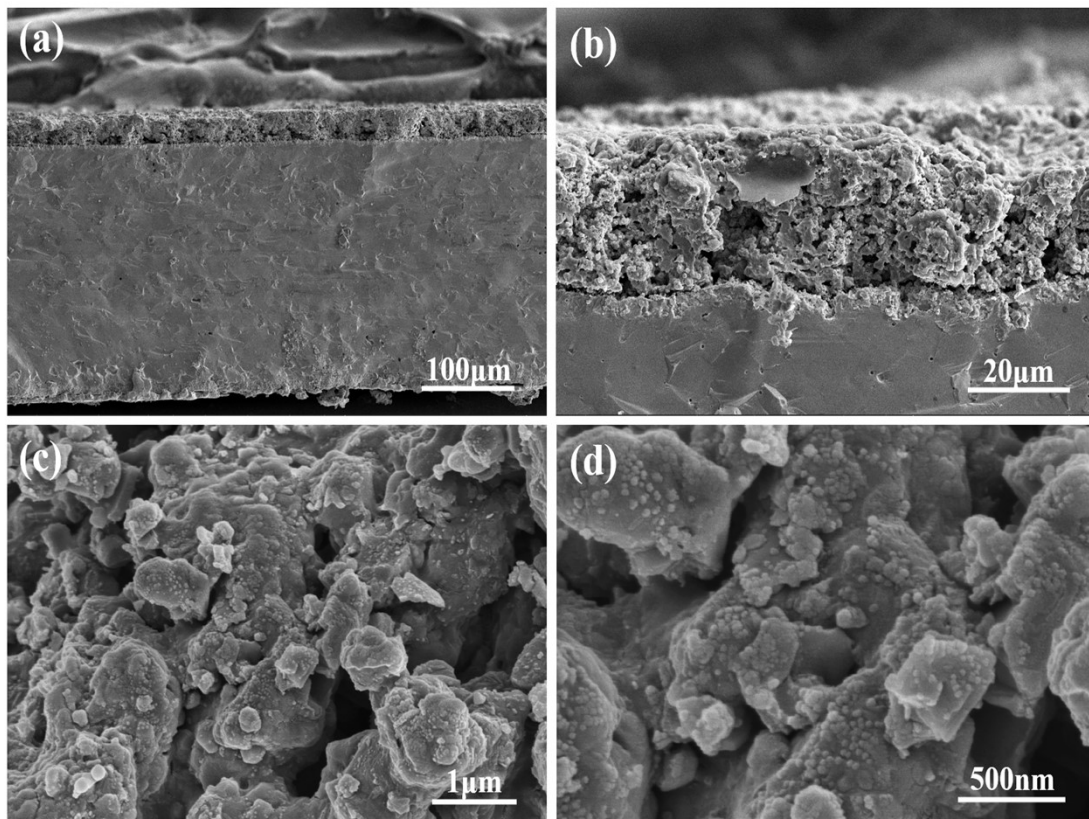

**Figure S7.** Cross section images of LSGM electrolyte supported single cell with SFCuM-R as the cathode and LSCF-SDC as the anode after 100h long-term stability testing.



**Table S1** Superficial C and O stoichiometry of the Sr<sub>2</sub>Fe<sub>1.25</sub>Cu<sub>0.25</sub>Mo<sub>0.5</sub>O<sub>6-δ</sub> electrode  
based on XPS peak fitting results.

| Superficial elements / Atomic % | CO <sub>3</sub> <sup>2-</sup> /C-C | O <sub>ad</sub> /CO <sub>3</sub> <sup>2-</sup> | O <sub>ad</sub> /O <sub>latt</sub> |
|---------------------------------|------------------------------------|------------------------------------------------|------------------------------------|
| Oxidizing                       | 0.56                               | 3.63                                           | 2.40                               |
| Reducing                        | 0.58                               | 3.75                                           | 4.54                               |

**Table S2** Superficial elements stoichiometry of the  $\text{Sr}_2\text{Fe}_{1.25}\text{Cu}_{0.25}\text{Mo}_{0.5}\text{O}_{6-\delta}$  electrode  
based on XPS results

| Superficial elements | Sr        | Fe   | Mo   | Cu   | O     | C     | Sr/(Fe+Mo+Cu) | $\text{CO}_3^{2-}$ |
|----------------------|-----------|------|------|------|-------|-------|---------------|--------------------|
| /Atomic %            |           |      |      |      |       |       |               | /Sr                |
| Oxidizing            | 11.5<br>4 | 2.25 | 2.81 | 2.44 | 47.99 | 32.97 | 1.54          | 0.76               |
| Reducing             | 11.0<br>8 | 1.88 | 1.82 | 2.03 | 47.31 | 35.87 | 1.93          | 0.84               |

**Table S3.** Current density comparison for CO<sub>2</sub> electrolysis obtained at 1.5 V and 800 °C with diverse cathodes.

| Fuel electrodes                                                                                                               | Electrolyte | Anode    | Feeding gas                        | Current density | Refs.     |
|-------------------------------------------------------------------------------------------------------------------------------|-------------|----------|------------------------------------|-----------------|-----------|
| La <sub>0.6</sub> Sr <sub>0.4</sub> Fe <sub>0.8</sub> Ni <sub>0.2</sub> O <sub>3-δ</sub>                                      | YSZ         | LSCF-SDC | CO <sub>2</sub> -30% CO            | 0.75            | 1         |
| Ce-La <sub>0.7</sub> Sr <sub>0.3</sub> Cr <sub>0.5</sub> Fe <sub>0.5</sub> O <sub>3-δ</sub>                                   | YSZ         | LSCF     | CO <sub>2</sub> -30% CO            | 0.9             | 2         |
| Sr <sub>2</sub> Fe <sub>1.5</sub> Mo <sub>0.5</sub> O <sub>6.8</sub> F <sub>0.1</sub>                                         | LSGM        | LSGM-SDC | 100% CO <sub>2</sub>               | 1.36            | 3         |
| NiFe@La <sub>0.6</sub> Sr <sub>0.4</sub> Fe <sub>0.8</sub> Mn <sub>0.2</sub> O <sub>3</sub>                                   | LSGM        | BLC      | CO <sub>2</sub> -1% CO             | 1.70            | 4         |
| CoFe@(Pr <sub>0.4</sub> Sr <sub>0.6</sub> ) <sub>3</sub> (Fe <sub>0.85</sub> Mo <sub>0.15</sub> ) <sub>2</sub> O <sub>7</sub> | YSZ         | LSCF-SDC | CO <sub>2</sub> -30% CO            | 1.01            | 5         |
| Sr <sub>2</sub> Fe <sub>1.4</sub> Mn <sub>0.1</sub> Mo <sub>0.5</sub> O <sub>6-δ</sub> -SDC                                   | LSGM        | LSCF-SDC | 100% CO <sub>2</sub>               | 1.35            | 6         |
| Co@La <sub>1.2</sub> Sr <sub>0.8</sub> Co <sub>0.4</sub> Mn <sub>0.6</sub> O <sub>4</sub> -GDC                                | LSGM        | LSCF-GDC | CO <sub>2</sub> -30% CO            | 0.75            | 7         |
| FeNi <sub>3</sub> @Sr <sub>2</sub> Fe <sub>1.5</sub> Mo <sub>0.5</sub> O <sub>6-δ</sub>                                       | LSGM        | LSM-GDC  | CO <sub>2</sub> -5% N <sub>2</sub> | 0.90            | 8         |
| Sr <sub>2</sub> Fe <sub>1.25</sub> Cu <sub>0.25</sub> Mo <sub>0.5</sub> O <sub>6-δ</sub>                                      | LSGM        | LSCF-SDC | 100% CO <sub>2</sub>               | 1.60            | This work |
| Sr <sub>2</sub> Fe <sub>1.25</sub> Cu <sub>0.25</sub> Mo <sub>0.5</sub> O <sub>6-δ</sub> -R                                   | LSGM        | LSCF-SDC | 100% CO <sub>2</sub>               | 2.5             | This work |

1. S. Liu, Q. Liu and J.-L. Luo, *J. Mater. Chem. A*, 2017, **5**, 2673-2680.
2. Y.-Q. Zhang, J.-H. Li, Y.-F. Sun, B. Hua and J.-L. Luo, *ACS Appl. Mater. Interfaces*, 2016, **8**, 6457-6463.
3. Y. Li, Y. Li, Y. Wan, Y. Xie, J. Zhu, H. Pan, X. Zheng and C. Xia, *Adv. Energy Mater.*, 2019, **9**, 1803156.
4. S. Wang, H. Tsuruta, M. Asanuma and T. Ishihara, *Adv. Energy Mater.*, 2015, **5**, 1401003.
5. S. Liu, Q. Liu and J.-L. Luo, *J. Mater. Chem. A*, 2016, **4**, 17521-17528.
6. Y. Jiang, Y. Yang, C. Xia and H. J. M. Bouwmeester, *J. Mater. Chem. A*, 2019, **7**, 22939-22949.
7. S. Park, Y. Kim, H. Han, Y. S. Chung, W. Yoon, J. Choi and W. B. Kim, *Appl. Catal. B: Environ.*, 2019, **248**, 147-156.
8. H. Lv, L. Lin, X. Zhang, D. Gao, Y. Song, Y. Zhou, Q. Liu, G. Wang and X. Bao, *J. Mater. Chem. A*, 2019, **7**, 11967-11975.
